1 TITLE: Paleocene origin of the Neotropical lineage of cleptoparasitic bees Ericrocidini-  
2 Rhathymini (Hymenoptera, Apidae)

3

4 AUTHORS: Aline C. Martins<sup>1</sup>, David R. Luz<sup>2</sup>, Gabriel A. R. Melo<sup>2</sup>

5

6 RUNNING TITLE: Origin of Ericrocidini-Rhathymini cleptoparasites

7

8 CORRESPONDING AUTHOR: Aline C. Martins

9 EMAIL OF CORRESPONDING AUTHOR: [martinsalinec@gmail.com](mailto:martinsalinec@gmail.com)

10

11 <sup>1</sup>Department of Zoology, University of Brasilia, 70910-900, Brasilia, Distrito Federal,  
12 Brazil. <sup>2</sup>Department of Zoology, Federal University of Paraná, PB 19020, 81531-980  
13 Curitiba, Paraná, Brazil.

14

15

16

17

18

19

20

21

22

23

24

25

26

27

28

29

30

31

32

33

34

35

36

37

38

39

40 **Abstract**

41

42 Cleptoparasitic bees abandoned the pollen collecting for their offspring and lay their  
43 eggs on other bees' provisioned nests. Also known as cuckoo bees they belong to  
44 several lineages, especially diverse in Apinae. We focused on a lineage of Apinae  
45 cleptoparasitic bees, the clade Ericrocidini+Rhathymini, which attack nests of the oil-  
46 collecting bees. We sequenced five genes for a broad sampling in this clade plus a large  
47 outgroup and reconstruct phylogeny and divergence times. We confirmed the  
48 monophyly of the clade Ericrocidini+Rhathymini and its position inside the ericrocidine  
49 line, together with the tribes Protepeolini, Isepeolini and Coelioxoidini. Our results  
50 corroborate the current taxonomic classification. *Ericrocis* is the basal most lineage in  
51 Ericrocidini and the position of *Acanthopus* and the most diverse genus *Mesoplia* were  
52 inconclusive. Ericrocidini+Rhathymini diverged from *Parepeolus aterrimus* 74 mya in  
53 the Cretaceous. Considering the robust molecular evidence of their sister relationships,  
54 the striking differences on the first instar larvae morphology of the two groups are  
55 probably adaptations to the distinct nesting biology of their hosts. As other parasites in  
56 the ericrocidine line, both groups possess larvae adapted to kill the immature host and to  
57 feed on floral oil provisioned by the host female. The evolution of host specialization in  
58 the line Ericrocidini+Rhathymini retroced to the Eocene when they arose synchronously  
59 with their hosts, *Centris* and *Epicharis*.

60

61

62 **Keywords:** cuckoo bees, Cretaceous, brood parasitism, *Centris*, *Epicharis*.

63

64

65

66

67

68

69

70

71

72 **Introduction**

73

74

75

76

77

78

79

80

81

82

83

84

85

86

87

88

89

90

91

92

93

94

95

96

97

98

99

100

101

102

103

104

Bees are the most important lineage of pollinating animals acting directly in the reproductive success of wild and cultivated angiosperms, therefore playing an important role in environment and human food production (Kremen et al., 2002; Klein et al., 2007). The origin of the bee lineage in the early Cretaceous, approximately 120 million years ago, is coincident with radiation of the most representative group of angiosperms, the eudicots, which are heavily dependent on bees for pollination (Cardinal & Danforth, 2013). The feeding behavior of bees represents a novelty in the evolutionary history of Hymenoptera: the changing from an carnivorous diet present in bee's closest relatives—apoid wasps and ants—to an exclusively vegetarian diet based on pollen feeding (Melo et al., 2011; Peters et al., 2017). Female and male bee adults feed on nectar produced by flowers, while the young are feed mainly with pollen as a source of protein, together with other floral energy-rich resources like nectar and oil (Michener, 2007).

The almost 20,000 bee species are recognized as belonging to a single family, the Apidae s.l. (Melo & Goncalves, 2005), classified in seven lineages—Andreninae, Apinae, Colletinae, Megachilinae, Melittinae and Stenotritinae—and distributed in all continents except Antarctica (Michener, 2007). The monophyly of Apidae is undoubtful and corroborated by morphological, behavioral and molecular evidences (Melo, 1999; Danforth et al., 2006; Michener, 2007; Branstetter et al., 2017; Peters et al., 2017). Much progress has been made on our understanding of bee phylogenetic relationships by the increasing use of molecular data and model-based methods. As a consequence, the newly proposed bee phylogenies have shed light on our understanding of crucial aspects of bee evolution like plant host choice evolution, social behaviour and cleptoparasitism (Danforth et al., 2011).

All bees feed on flower resources, but females of many species abandoned both pollen collecting and construction of nests for their own offspring. Instead they parasitize other bee species laying their eggs in provisioned nests (Michener, 2007). This relationship where the offspring of one species feed and develops in the food stored by a female of other species is called brood parasitism, or specifically in bees, cleptoparasitism or cleptoparasitic behavior (Rozen, 1991). Cleptoparasitism has been reported in almost all bee lineages, excepting Mellitinae, but a special diversity is found

105 in the long-tongued lineage (subfamilies Apinae and Megachilinae) (Straka & Bogusch,  
106 2007a; Cardinal et al., 2010; Litman et al., 2013). The cleptoparasitism originated early  
107 in the history of bees, approximately 95 Mya in the Cretaceous, in the large *cleptoclade*  
108 of Apinae (Cardinal et al., 2010). While many parasitic groups evolved from pollen-  
109 collecting ancestors, the way back—cleptoparasite evolving to pollen-collecting—was  
110 never reported (Litman et al., 2013). Despite the risks associated to obligatory  
111 parasitism and apparent decrease in diversification rates associated to these lineages, it  
112 evolved many times independently in bees (Michener, 2007; Litman et al., 2013)

113 Close phylogenetic proximity between hosts and cleptoparasites has been  
114 argued by previous authors (Wcislo & Cane, 1996; Michener, 2007), following a pattern  
115 known mostly as Emery's rule in ants and wasps (Hölldobler & Wilson 1990). After the  
116 work of Emery (1909), who based his conclusion on a limited number of ant species,  
117 LeMasne (1956) extrapolated this pattern to other Hymenoptera and named it as  
118 Emery's rule. In bees we can find some groups of cleptoparasites closely related to their  
119 hosts, especially on younger cleptoparasitic clades (Litman et al., 2013), for example:  
120 *Aglae* and *Exaerete* on *Eufriesea* and *Eulaema* (Euglossini) (Cardinal et al., 2010);  
121 *Ctenoplectrina* on *Ctenoplectra* (Ctenoplectrini) (Schaefer & Renner, 2008). However,  
122 most cleptoparasitic groups, at least in Apinae s.l., contradict Emery's rule. Instead,  
123 cleptoparasitism arose four times independently in this bee clade and most  
124 cleptoparasite and hosts lineages were shown not be closely related (Cardinal et al.,  
125 2010). Most apine cleptoparasites are included in a large monophyletic group, including  
126 the nomadine tribes (here referred as the nomadine line) and additional tribes previously  
127 spread apart within Apinae (*e.g.* Melectini, Osirini, Rhathymini, Ericrocidini, Isepeolini,  
128 Protepeolini), with the other three independent origins referring to the genera *Exaerete*  
129 and *Aglae*, in Euglossini, and *Ctenoplectrina*, in Ctenoplectrini. This arrangement  
130 contradicts previous morphological analyses based on adult and larval characters (Roig-  
131 Alsina & Michener, 1993; Straka & Bogusch, 2007a).

132 Morphological data also suggested a close relatedness between the  
133 cleptoparasitic Ericrocidini and Rhathymini and their hosts, *Centris* and *Epicharis*  
134 (traditionally placed in a single tribe, Centridini, but see Martins & Melo 2016),  
135 evidenced by many supposedly shared characters (Snelling & Brooks, 1985). Further  
136 phylogenetic analyses based on morphology (Roig-Alsina & Michener, 1993; Straka &

137 Bogusch, 2007a) and molecules (Cardinal et al., 2010) did not support their close  
138 relationship. Alternatively morphological phylogenies have been pointed to sister  
139 relationship between Ericrocidini and Melectini (Roig-Alsina & Michener, 1993) or  
140 Ericrocidini and Isepeolini (Straka & Bogusch, 2007a). All recent molecular evidences  
141 contradict both hypothesis and pointed to the sister relationship between Ericrocidini  
142 and Rhathymini, which are nested inside the large cleptoclade, forming the ericrocidine  
143 line together with Protepeolini, Isepeolini and Osirini (Cardinal et al., 2010; Cardinal &  
144 Danforth, 2013; Litman et al., 2013), while *Centris* and *Epicharis* are closely related to  
145 the corbiculate bees (Martins et al., 2014; Martins & Melo, 2016).

146 Ericrocidini comprises approximately 44 species distributed in eleven genera,  
147 exhibiting mostly a neotropical distribution, with a single genus (*Ericrocis*) entering the  
148 Nearctic region, while Rhathymini includes only one genus, *Rhathymus*, with about 20  
149 species, all neotropical (see Fig. 1 and 2 for morphological diversity in the group)  
150 (Moure & Melo, 2012a, 2012b). Snelling & Brooks (1985) analyzed the phylogenetic  
151 relationships among Ericrocidini genera, using a *bauplan* approach, with Rhathymini  
152 and Centridini as outgroups. Their phylogeny indicated Ericrocidini and Rhathymini as  
153 sister groups, although their outgroup choice was rather limited, and *Ericrocis* as the  
154 basal most lineage within Ericrocidini. Ericrocidini parasitize primarily nests of *Centris*  
155 (although *Mesoplia rufipes* can also attack nests of *Epicharis*; see Rocha-Filho et al.,  
156 2009 and references therein) and Rhathymini parasitize only species of *Epicharis*  
157 (Michener, 2007; Werneck et al., 2012).

158 Host associations in Ericrocidini and Rhathymini are still poorly documented.  
159 The hosts of *Ctenioschelus*, *Eurytis* and *Hopliphora* remain unknown (Thiele, 2008;  
160 Rocha-Filho et al., 2009), and only recently it has been discovered that *Cyphomelissa*  
161 parasitizes *Centris* (*Melacentris*) (Rocha-Filho et al. 2017). Adult females of both tribes  
162 introduce their eggs into closed cells of the host by breaking a hole in the cell closure  
163 (Rozen, 2003; Rozen et al., 2011). When a female bee parasitizes a closed nest cell, her  
164 offspring will find the nest already provisioned and the young of the host female (egg or  
165 larva), which means the parasite larva needs to kill the host immature in order to have  
166 enough food for its development. This strategy involves morphological and behavioural  
167 adaptations on the cleptoparasitic larva (for example elongate, sickle-shaped mandibles)  
168 that allow them to kill the host offspring, therefore it is called hospicidal larva (from the

169 latin *hospes*=host, *caedo*= to kill) (Rozen, 1989).

170           The present study focused on the phylogenetic relationships and divergence  
171 times among the clade Ericrocidini+Rhathymini, and the implications on classification  
172 and evolution of cleptoparasitic behaviour in this lineage. Taking into account recent  
173 hypotheses of relationship between Ericrocidini and Rhathymini, as well as their  
174 placement within Apinae, we reconstruct their phylogenetic relationships using related  
175 cleptoparasitic tribes from the ericrocidine and nomadine lines plus Melectini and  
176 Anthophorini as outgroups. This new outgroup choice associated to a more  
177 representative sampling will offer new opportunities to understanding the evolution of  
178 this bee group and to propose a phylogenetic based classification for Ericrocidini and  
179 Rhathymini.

180

## 181 **Material and Methods**

182

### 183 *Taxon Sampling*

184

185           We newly sequenced 17 species of Ericrocidini representing all genera, except  
186 *Aglamelissa*, mostly with >2 species per genera, and five species of Rhathymini,  
187 totalizing 20 species and 10 genera (Table S1). We made an effort to include  
188 morphologically distinct species and a wider geographic distribution. In total, 73 new  
189 sequences have been submitted to GenBank (Table S1). Most of our ingroup  
190 representatives were newly sequenced, but we also included eight ingroup terminals  
191 from GenBank (Table S2). Vouchers from the newly produced sequences are deposited  
192 mostly at the DZUP – Jesus Santiago Moure Entomological Collection at Federal  
193 University of Paraná, Brazil, or at institutions that lent specimens from DNA extractions  
194 (Table S1). As outgroup, we included representatives of several tribes of Apinae  
195 (Anthophorini, Caenoprosopidini, Coelioxoidini, Epeolini, Ammobatoidini, Isepeolini,  
196 Protepeolini, Melectini, Nomadini, Osirini, Ammobatini), mostly cleptoparasites from  
197 the cleptoclade plus Anthophorini, all downloaded from GenBank (Table S2).

198 Taxonomic classification follows Moure et al. (2012).

199

### 200 *Molecular data sampling*

201

202 DNA was isolated mostly from newly collected specimens preserved in EtOH,  
203 but also from some dried pinned specimens collected for less than 10 years. DNA was  
204 extracted using the Qiagen DNeasy blood & tissue extraction kit, following the  
205 manufacturer's protocol, except for pinned specimens, which remained longer period in  
206 the lysis phase. We amplified and sequenced four nuclear genes: the ribosomal 28S gene  
207 (~1400 base pairs) and three nuclear protein-coding genes: LW-Rhodopsin (~700 base  
208 pairs), Elongation factor 1 $\alpha$  – F2 copy (~1,000 base pairs), and RNA-polymerase (~900  
209 base pairs). Additionally, we sequenced the mitochondrial barcode gene cytochrome  
210 oxidase I (~700 base pairs). PCR amplifications were performed with standard protocols.  
211 We used primers from the literature, but also designed two new primer pairs for LW-  
212 Rhodopsin and Elongation factor 1 $\alpha$  to increase the success of amplification. All  
213 primers and PCR conditions are described in Table S3. PCR products were purified and  
214 sequenced by Macrogen Inc., South Korea. Forward and reverse strands were assembled,  
215 edited and analyzed in Geneious R8 (Biomatters, 2013). All sequences were Blast  
216 searched to prevent using contaminated samples. Sequences were submitted to  
217 GenBank using the GenBank submission tool plugin in Geneious R8.

218

### 219 *Alignment and phylogenetic inference*

220 We aligned the sequences using the MAFFT vs. 7program (Katoh & Standley,  
221 2013) using the parameters: 1PAM/k=2 for the nucleotide scoring matrix; 1.53 for gap  
222 opening penalty and 0 offset value (default); and leaving gappy regions. We used  
223 different alignment strategies depending on the gene. The 28S ribosomal gene were  
224 aligned using secondary structure and the algorithm Q-INS-i. The protein-coding genes  
225 that contain introns, *i.e.* elongation factor 1 $\alpha$  and LW-Rhodopsin, were aligned using the  
226 E-INS-I strategy, recommended by MAFFT manual for sequences with multiple  
227 conserved domains and long gaps. The protein coding genes with no introns in the  
228 region we amplified (RNA polymerase) and the CO1 were aligned using G-INS-i,  
229 recommended for sequences with global homology. Except for the 28S structural  
230 alignment, which were performed on the MAFFT *online* server, all the remaining were  
231 performed in Geneious R8. Minor adjustments were made by eye. Each gene matrix  
232 was submitted to individual tree searches to check for strong incongruences among

233 datasets (*i.e.* well-supported incongruences). In the absence of strongly supported  
234 incongruences all genes were concatenated in one matrix totalizing 4519 aligned  
235 nucleotides.

236 Dataset was partitioned in 13 partitions: the 28 S ribosomal gene; introns and  
237 exons of LW-Rhodopsin and elongation factor 1-alpha were considered as separated  
238 partitions, totalizing 8 partitions; RNA polymerase gene as one partition and the  
239 mitochondrial gene CO1 was partitioned by codon position. This scheme was used in  
240 the phylogenetic and dating analyses, except as indicated below.

241 Maximum likelihood tree searches and bootstrapping were performed in RaxML  
242 (Stamatakis, 2006) using the graphical interface raxmlGUI (Silvestro & Michalak, 2012)  
243 with 1000 bootstrap replicates. Bayesian tree searches were performed in MrBayes 3.2  
244 (Ronquist et al., 2012) with 12 data partitions (the 3<sup>rd</sup> position of the CO1 gene was  
245 excluded due to non-convergence caused by conflict with the other partitions during  
246 preliminary analyses). The Markov Chain Monte Carlo (MCMC) was run in the  
247 CIPRES server (Miller et al., 2010), for 10 million generations, with trees sampled every  
248 1000 generations. Default MrBayes priors were used, except for implementation of a  
249 mixed evolutionary model of nucleotide substitution. Convergence of the chains was  
250 assessed in Tracer 1.6 (Rambaut et al., 2014) and trees obtained prior to convergence  
251 were discarded as *burnin* (25%), and a 50% majority rule consensus tree was  
252 constructed from the remaining trees.

253

#### 254 *Divergence times estimates*

255 Bayesian age estimates were performed using BEAST 2 (Bouckaert et al., 2014)  
256 at the same matrix analyzed phylogenetically with Bayesian inference and maximum  
257 likelihood. We used a Yule tree prior, GTR+G substitution model and uncorrelated  
258 lognormal relaxed clock. The same partitioning scheme was applied, totalizing 13  
259 partitions. The MCMC run was performed in the CIPRES server (Miller et al., 2010),  
260 with 50 million generations, sampled every 10000<sup>th</sup> generations. Convergence of chains  
261 were checked in Tracer (BEAST package) considering effective sample sizes (ESS)  
262 values  $\geq 200$ . The maximum clade credibility (MCC) tree was produced in TreeAnnotator  
263 (BEAST package).

264 One fossil was used to calibrate the tree, *Paleohabropoda oudardi* from the



265 Paleocene of Menat (Puy-de-Dôme, France), which is considered the third oldest bee  
266 fossil (Michez et al., 2009). Phylogenetic analysis of 17 morphological characters plus  
267 morphometric analysis indicated that this fossil clearly belongs to the extant tribe  
268 Anthophorini (Michez et al., 2009). *Paleohaproboda oudardi* have been used to  
269 calibrate the node uniting all Anthophorini (Cardinal et al., 2010; Cardinal & Danforth,  
270 2013). Because it might represent the stem lineage of this tribe we applied a normal  
271 distribution prior with a mean of 60 Ma and stdev of 5. We also constrained the root age  
272 according to previous estimates for the divergence between Anthophorini and the  
273 cleptoclade (Martins & Melo, 2016) applying a normal distribution prior with mean of  
274 100 Ma and stdev of 5. Fossil calibration and constrains are depicted in Figure 4.

275

## 276 **Results**

277

### 278 *Phylogenetics*

279

280 The aligned data matrix comprised 4419 nucleotides, of which 1283 were derived  
281 from the ribosomal gene 28S, 836 from RNA polymerase, 759 from long-wavelength  
282 rhodopsin, 963 from elongation-factor 1-alpha and 678 from the mitochondrial  
283 cytochrome oxidase I. Figure 3 and Supplementary Material (Figure S1) show the  
284 phylograms, respectively, of the 50% majority-rule consensus tree of the Bayesian  
285 analysis and the maximum likelihood tree. Both trees were congruent, *i.e* there were no  
286 clades that were strongly supported ( $\geq 70\%$  bootstrap support,  $\geq 0.95$  Bayesian posterior  
287 probability) in one tree but contradicted in the other. Trees were deposited in TreeBase  
288 under number (will be submitted upon manuscript acceptance).

289 The bee tribe Ericrocidini is highly supported as monophyletic (Fig. 3; 1.00  
290 Bayesian posterior probability [BPP], 100% bootstrap support [BS]), as well as its sister  
291 relationship to Rhathymini (1.00 BPP; 100% BS), which is also strongly supported as  
292 monophyletic (1.00 BPP; 100% BS). The relationships of the well-established clade  
293 Ericrocidini+Rhathymini found here are congruent with other higher-level analyses of  
294 Apinae (Cardinal et al., 2010). The clade Ericrocini+Rhathymini in our analysis is sister  
295 to *Parepeolus aterrimus* (Osirini) with relatively good support (0.99 BPP; 90% BS) as  
296 found in other studies on Apinae (Cardinal et al., 2010; Martins et al., 2014). Other

297 Osirini are grouped with Protepeolini and Isepeolini (Fig. 3). The dubious position of  
298 *Parepeolus* makes the tribe Osirini paraphyletic, although without morphological  
299 support, as it will be further discussed. Despite some small topological differences, the  
300 close relationship found here for Ericrocidini +Rhathymini with Osirini, Protepeolini,  
301 Isepeolini and Coelioxoidini, also called the ericrocidine clade (Litman et al., 2013), is  
302 consistent with previous phylogenetic molecular based studies. Similarly, we found  
303 support for the relationship among the nomadine line (Caenoprosopidini, Epeolini,  
304 Ammobatoidini, Ammobatini, Nomadini) (0.96 BPP; 78% BS). In both phylogenetic  
305 analyses (ML and BI), Melectini is sister to the remaining cleptoparasitic tribes with  
306 good support (1 BPP; 100% BS) as in other analysis (Cardinal & Danforth, 2013), but  
307 this position seems rather unstable among apine phylogenies. It appears as sister to  
308 Anthophorini in our BEAST analysis (Fig. 4) or as sister to the clade formed by the  
309 nomadine and ericrocidine lines in other higher-level apine phylogenies (Cardinal et al.,  
310 2010; Martins et al., 2014).

311 As regards the internal relationships in Rhathymini, two main clades were  
312 recovered (Fig. 3), both of them with strong support. The first clade contains *R. bicolor*  
313 and *R. unicolor* and corresponds to *Rhathymus* s.str., while the second contains the other  
314 remaining sampled Rhathymini and corresponds to species that can be placed in  
315 *Nanorhathymus* (Engel et al., 2004). *Rhathymus* in its broad sense is composed by  
316 twenty described species, widely distributed in the Neotropical region, from Mexico to  
317 Paraguay.

318 All genera of Ericrocidini with  $\geq 2$  terminals were supported as monophyletic,  
319 corroborating the current genus-level classification (Moure & Melo, 2012a). On the  
320 other hand, the basal most relationships in the tribe were not well resolved: in the  
321 Bayesian analysis, *Ericrocis* comes out as sister group of the remaining Ericrocidini,  
322 with low support, followed by a polytomy with four clades, two being the genera  
323 *Acanthopus* and *Mesoplia*, and the other two involving grouping of genera, both of them  
324 strongly supported. The group of the four genera *Mesocheira*+*Ctenioschelus*+  
325 *Epiclopus*+*Mesonychium* represents the first split in Ericrocidini on the ML tree, where  
326 it is also strongly supported. *Ericrocis* has a different position on the ML tree, appearing  
327 as sister to a clade containing *Cyphomelissa*+*Hopliphora*+*Eurytis* and *Acanthopus*, also  
328 with low support (Fig. S1).

329 In contrast to the relatively unstable relationship arrangements at the base of the  
330 Ericrocidini, we observe several strongly supported groupings of sister genera,  
331 congruent between both trees. The monotypic genus *Mesocheira* and *Ctenioschelus*  
332 formed a clade (1.00 BPP; 100 % BS). *Mesocheira bicolor* is widely distributed in  
333 Neotropical region (from Central America to Argentina). *Ctenioschelus* is composed by  
334 one widely distributed species, *C. goryi*, present in our analysis by two samples, one  
335 from Mexico and another from the Brazilian Cerrado, and *C. chalcodes*, occurring in  
336 Mexico and Costa Rica. As sister clade to *Ctenioschelus*+*Mesocheira* we observe  
337 another well-supported grouping, composed by *Epiclopus* and *Mesonychium* (1.00 BPP;  
338 100 % BS). *Epiclopus*, which contains four species, is restricted to the Andean region,  
339 while *Mesonychium*, with nine described species, is widely distributed in South America.  
340 *Eurytis*, which occurs from northern South America to Paraguay, is sister to *Hopliphora*,  
341 and both sister to *Cyphomelissa*, all relationships well supported. *Hopliphora*, *Eurytis*  
342 and *Cyphomelissa* have been considered by some authors as a single genus, *Hopliphora*  
343 (Snelling & Brooks, 1985; Michener, 2007). *Hopliphora* s.s. possess one widely  
344 distributed species (Argentina and Brazil), and *Cyphomelissa* possess four species, two  
345 Amazonian (*C. magnifica* and *C. superba*), and two from the Atlantic Forest (*C.*  
346 *commata* and *C. diabolica*).

347 *Mesoplia* forms a well-supported clade (1.00 BPP; 100% BS) but its sister  
348 relationship is not well-defined: in the Bayesian tree it appears as an isolated lineage in  
349 the basal polytomy, but in the ML tree it is sister to the clade *Cyphomelissa*+  
350 *Eurytis*+*Hopliphora* plus *Acanthopus*. All these relationships present low support in the  
351 analyses. *Mesoplia* is the most diverse genus in the tribe, with seventeen described  
352 species, and presents the widest geographic range, occurring from the southwestern  
353 United States (Arizona) to Argentina, including the Greater and Lesser Antilles.

354

355 *Divergence times*

356

357 A molecular clock fossil calibrated tree indicates that the line  
358 Ericrocidini+Rhathymini diverged from other cleptoparasitic lineages in the late  
359 Cretaceous at 74million years ago (Highest posterior density interval – HPD: 57–90mya)  
360 and that they diverged from each other in the Paleocene at 61 mya (48–77) (Fig. 4). The

361 crown age of Rhathymini is estimated as 25 my (15–37) and of Ericrocidini as 41 my  
362 (32–53). The ages estimated here for the outgroup sampling, *i.e.* Anthophorini and  
363 cleptoparasitic lineages, were very similar to those found by other studies (Cardinal et  
364 al., 2010; Martins et al., 2014). All results presented bellow refers to phylogenetically  
365 well-supported clades (*i.e.* BPP  $\geq$  0.95; BS  $\geq$  70 %) unless stated otherwise.

366 The two major clades within the Rhathymini have somewhat similar ages, both  
367 having differentiated in the Miocene. The age of the clade containing *Rhathymus* s.s. is  
368 slightly older (13 my; 5–22) than the other clade (10 my; 4–17). The first split in  
369 Ericrocidini, as estimated by the BEAST analysis, separated the lineage composed by  
370 the genera *Mesocheira*, *Ctenioschelus*, *Epiclopus* and *Mesonychium*, at 34 mya (23–43).  
371 *Mesocheira* and *Ctenioschelus* diverged at 20 my (12–30) and *Epiclopus* and  
372 *Mesonychium* at 17my (10–24). The crown age for the lineage  
373 *Cyphomelissa*+*Eurytis*+*Hopliphora* is estimated at 23 (14–32) my, while the split  
374 between *Hopliphora* and *Eurytis* is estimated to have occurred at 18 my (11–27).  
375 *Cyphomelissa* and *Eurytis* are relatively young, both differentiated in the Pliocene  
376 around 3 Mya. The phylogenetic position of the genus *Mesoplia* is uncertain, indicated  
377 as related to the clade *Cyphomelissa*+*Eurytis*+*Hopliphora*, although with low support.  
378 The BEAST dating analysis placed *Mesoplia* also close to this clade, which in this  
379 analysis is sister to *Acanthopus*+*Ericrocis*. The crown age of *Mesoplia* is estimated as  
380 16 my (8–26), that of *Acanthopus* as 4 my (2–6) and of 2 my (1–5). In any case,  
381 considering the many differences between the topology returned by the BEAST analysis  
382 and those resulting from the Bayesian and ML analyses, the estimated divergence times  
383 within Ericrocidini should be used with caution, in particular for clades not supported in  
384 these latter analyses.

385

## 386 **Discussion**

387

### 388 **Systematics and divergence times**

389 Our analysis confirms the monophyly of the clade Ericrocidini+Rhathymini plus  
390 the sister relationship of this line with *Parepeolus aterrimus* (Osirini) found in previous  
391 studies (Cardinal et al., 2010; Martins et al., 2014). We also found support for the  
392 ericrocidine line (Litman et al., 2013) as shown in previous analyses. Moreover we

393 show the monophyly of all Ericrocidini genera, corroborating the current taxonomic  
394 classification (Moure & Melo, 2012b). In Rhathymini we also found support for  
395 recognition of the genus *Nanorhathymus* as proposed by Engel et al. (2004 a, b).

396 This is the first molecular-based study focused on the tribes Ericrocidini and  
397 Rhathymini and we present results that are partly congruent with the previous  
398 phylogeny available (Snelling & Brooks, 1985). Snelling & Brooks' morphological  
399 phylogeny, based on a *bauplan* approach, found support for the position of *Ericrocis* as  
400 the basal most lineage of Ericrocidini (Snelling & Brooks, 1985), a positioning also  
401 recovered here in the Bayesian analysis, although with low support. We also recovered  
402 the large clade formed by the genera *Mesocheira*+*Ctenioschelus*+  
403 *Epiclopus*+*Mesonychium*, but in Snelling & Brooks' phylogeny *Aglaomelissa* was  
404 included and indicated as sister to *Ctenioschelus*. The inclusion of *Aglaomelissa* in our  
405 molecular matrix would likely confirm the proximity of this genus to *Ctenioschelus* and  
406 *Mesocheira*, considering the strong morphological evidence supporting their close  
407 relationship.

408 Our studies also supported the monophyly of the species treated by Snelling &  
409 Brooks as the single genus *Hopliphora* and here represented as the separate genera  
410 *Cyphomelissa*, *Eurytis* and *Hopliphora* s.s. The many morphological differences  
411 between these three genera (see key to genera of Ericrocidini in Silveira et al. (2002)) is  
412 here reflected in the deep divergence time estimated for them (Fig. 4), equivalent in age  
413 to well-established genera in other clades of Ericrocidini.

414 For both *Acanthopus* and *Mesoplia*, our analyses were inconclusive. The  
415 resolution obtained in the ML analysis derives from low-supported branches and  
416 therefore seems unreliable as indicator of the relationships of the involved clades.  
417 Indeed, the short branches at the base of Ericrocidini suggest a rapid diversification of  
418 the main lineages, reflecting a problem that likely will not be promptly solved simply  
419 with additional data. Inclusion of additional terminals in future studies should also have  
420 a small effect, although more representatives of *Mesoplia*, focusing on a broader  
421 representation of this diverse genus, might help in resolving the basal relationships  
422 within the tribe.

423 *Parepeolus aterrimus* was recovered here as sister to Ericrocidini+Rhathymini  
424 as found previously and this result implies in a paraphyletic Osirini. Although there is

425 no molecular phylogenetic treatment of the tribe Osirini as a whole, the morphology-  
426 based phylogeny provided by Roig-Alsina (1989) places *Parepeolus* within this tribe, as  
427 sister to the Chilean genus *Ecclitodes*. The synapomorphies for Osirini are the cervical  
428 ventral sclerite and a ventral carina on the forecoxae, while the sister- group relationship  
429 between *Parepeolus* and *Ecclitodes* is supported by the enlarged, flattened dorsal branch  
430 of the male gonostylus and a bifid ventral branch (Roig-Alsina 1989).

431 The monophyly of the ericrocidine line—tribes Ericrocidini, Rhathymini, Osirini,  
432 Protepeolini, Isepeolini and Coelioxoidini—is once more corroborated here. A  
433 morphological character unique to this group is the obliteration of the epistomal suture  
434 below the tentorial pit (Melo, unpubl. data). While this character has been used in the  
435 diagnosis of some tribes of this lineage, as for example Osirini (Roig-Alsina 1989) and  
436 Rhathymini (Engel et al. 2004a), its condition as a putative synapomorphy for the entire  
437 line has not been previously recognized.

438 Divergence time estimates indicated that the origin of the clade  
439 Ericrocidini+Rhathymini took place between the end of the Cretaceous and the  
440 Paleocene, with the split between them estimated at 61mya. Rhathymini's crown is  
441 slightly younger than that of the Ericrocidini, but both originated between the Eocene-  
442 Oligocene border. Among the several cleptoparasitic lineages in long-tongued bees  
443 (which totalize at least nine different origins) the cleptoclade represent the oldest origin  
444 of this behaviour (Litman et al., 2013), which means Ericrocidini+Rhathymini is one of  
445 the oldest lineages of cleptoparasitic bees. As expected, this lineage arose after the  
446 origin of their hosts, *Centris* and *Epicharis*. *Epicharis* line diverged from  
447 *Centris*+corbiculate bees in the Cretaceous, at circa of 90 mya (Martins et al., 2014;  
448 Martins & Melo, 2016), much earlier than the differentiation of the ancestral lineage of  
449 their parasites. Rhathymini showed an almost coincidental origin to their hosts crown,  
450 25 my (*Epicharis* crown is estimated to be 31 to 28 my (Martins et al., 2014; Martins &  
451 Melo, 2016). An even closer match has been found here for Ericrocidini's crown age  
452 and that of their hosts *Centris* (*Centris* crown is estimated to be 43–41 my) (Martins et  
453 al., 2014; Martins & Melo, 2016).

454

455 **Diversity and evolution of cleptoparasitism in the Ericrocidini+Rhathymini clade**

456

457           Except for Protepeolini and Isepeolini which is known to parasitize open cells  
458 (by indirect evidence in the latter case), the remaining tribes of the ericrocidine line  
459 parasitize closed cells and this seems to be the ancestral state for this clade (Litman et  
460 al., 2013). This means they all have hospicidal larvae with morphological and  
461 behavioural adaptations to kill the immature host (Rozen, 1989, 1991). Litman et al.  
462 (2013) suggested this strategy as a second phase in the evolution of the cleptoparasitic  
463 behaviour, derived from the behaviour of parasitizing open cells, in which the adult  
464 female bee kills the host larva or egg before laying her own eggs. In a third phase, the  
465 adult female deposits her egg in a nest cell that is still open, in process of provisioning,  
466 but the hospicidal larva kills other immature present, as found in the nomadine line. The  
467 evolutionary scenario within the ericrocidini line, however, is more complex, with  
468 Osirini exhibiting a mixture of the first and second phases of Litman's et al. scheme. In  
469 *Protosiris* (Rozen et al., 2006) and most likely in *Epeoloides* (Straka & Bogush, 2007b),  
470 the female cleptoparasite kills the host immature (with the sting in *Protosiris* and  
471 apparently by eating in *Epeoloides*). At the same time, the larvae of these two genera  
472 have hospicidal morphology (Rozen et al., 2006; Straka & Bogush, 2007b). It is  
473 possible that the hospicidal morphology exhibited by the cleptoparasite larva evolved  
474 first as a weapon against conspecific competitors in situations of multi-parasitized host  
475 cells and later was co-opted to kill the host immature, freeing the female cleptoparasite  
476 from this task and therefore diminishing the time spent by her to successfully parasitize  
477 the host nest.

478           The ericrocidine line includes most cleptoparasite lineages that use oil-collecting  
479 hosts (except *Ctenoplectrina* that parasitize its sister lineage, the oil bee *Ctenoplectra*),  
480 *i.e.* Ericrocidini, Rhathymini, Coelioxoidini (parasitizes *Tetrapedia*), and Osirini  
481 (parasitizes Tapinotaspidini, in Apinae, and *Macropis*, in the Melittinae). Parasites using  
482 oil-collecting hosts occur only in Apinae and evolved one or two times in the large  
483 cleptoclade (Habermannová et al. unpubl.). Using oil-collecting hosts obviously limits  
484 the host pool, and requires adaptation of larvae to feed on oil, therefore switching to oil-  
485 collecting hosts should be less likely than returning back to non-oil collecting hosts  
486 (Habermannová et al. unpubl.).

487           The diversity found in Rhathymini and Ericrocidini is proportional to the  
488 diversity found in their hosts. Rhathymini (20 species) and *Epicharis* (35 species) are

489 much less diverse comparatively to their related groups Ericrocidini (44 species) and  
490 *Centris* (230 species). This could be the result of the association parasite-host, but also  
491 product of many other factors, such as geographical distribution or other limits to the  
492 diversification in these groups. The comparative diversity and association between  
493 Ericrocidini and *Centris* evidenced the discrepant classification systems currently  
494 adopted for the two lineages. While in Ericrocidini, a system with several separate  
495 genera is in use, in *Centris* we observe a more conservative approach, where all  
496 species are grouped in a single genus divided in many subgenera. The pattern of host  
497 association between Ericrocidini and *Centris*, as well as their antiquity, reinforces the  
498 need of treating *Centris* as many different genera due to the number of species, but  
499 mainly due to the significant biological differences among the subgenera regarding  
500 parasite association, floral host choices, nesting biology and others (see Martins & Melo,  
501 2016).

502         Whether the higher diversity in Ericrocidini and *Centris* is derived from higher  
503 speciation rates or lower extinction rates should be matter for future investigation. It is  
504 indeed clear that both groups occupy a wider range, including forests, open plant  
505 formations, desert and semi-desert areas, while Rhathymini and *Epicharis* remained  
506 restricted to tropical forests. In *Centris* and *Epicharis* this pattern of distribution is  
507 associated to their floral host choice. *Centris* species are associated to a broad range of  
508 oil-producing angiosperms, belonging to six families, while *Epicharis* collect oil only  
509 on species of Malpighiaceae, which are primarily associated to tropical forests (Martins  
510 et al., 2015). Probably, oil host plant distribution influences habitat occupation not only  
511 of the floral visitors (*Centris* and *Epicharis*) but also of their specialized parasites,  
512 Ericrocidini and Rhathymini.

513         The pattern of host association in Ericrocidini usually follows comparable body  
514 size and geographical distribution. As summarized by Rocha-Filho et al. (2009), the  
515 relationships are not species-specific, but in some cases all species of a given genus of  
516 Ericrocidini parasitize species of the same subgenus in *Centris*, for example all  
517 *Acanthopus* attacks nests of *Centris* (*Ptilotopus*). Apparently some Ericrocidini genera  
518 broke this rule parasitizing more than one subgenus of *Centris*, for example *Mesocheira*,  
519 *Mesoplia*, *Epiclopus* (Rocha-Filho et al., 2009 and references therein). However this  
520 “host broadening” is only apparent and we can observe a preference among the main



521 clades of *Centris*: *Melacentris*, *Trachina* and *Centris* (Martins & Melo, 2016).

522 *Aglaomelissa*, for example, parasitize different species in different subgenera, but all  
523 from the clade *Trachina*.

524 Comparative studies of the mode of parasitism and larval morphology between  
525 Ericrocidini and Rhathymini have been carried by Rozen (1969, 1991), Rozen et al.  
526 (2006) and Straka & Bogush (2007a). Rozen (1969) argued for the clade  
527 Ericrocidini+Rhathymini based on a greatly elongate labiomaxillary region shared by  
528 the mature larvae, according to him “a specialized character that is unlikely to have  
529 arisen twice”. After studying the first-instar larvae, Rozen (1991) retracted from his  
530 earlier position of a common ancestor between the two tribes due to the many  
531 differences presented by their first-instar larvae. One of the most striking differences is  
532 the hypognathous head of the first instar larvae of *Rhathymus* compared to the strongly  
533 prognathous larvae in Ericrocidini (Rozen, 1991; Rozen et al., 2006). Straka &  
534 Bogush’s (2007a) phylogenetic analyses of the larval characters also did not support a  
535 sister group relationship between Rhathymini and Ericrocidini.

536 Considering the robust molecular evidence for the clade  
537 Ericrocidini+Rhathymini, one might conclude that the differences in their first-instar  
538 larvae are likely adaptations to the distinct nesting biology exhibited by their host bees.  
539 The Melectini, the nomadine line and most tribes of the ericrocidini line, including  
540 Ericrocidini, have prognathous larvae, with a long and sclerotized head capsule, bearing  
541 large elongate mandibles (Rozen, 1991; Rozen et al., 2006), with the Protepeolini and  
542 some genera of the nomadine line having an intermediate morphology. Therefore, the  
543 Ericrocidini seem simply to have maintained the plesiomorphic condition evolved in the  
544 ancestor of the entire cleptoclade.

545 On the other hand, it is noteworthy to point out that hypognathous first-instar  
546 larvae are found only in the tribes associated with oil-collecting hosts, *i.e.* in  
547 Coelioxoidini, Osirini and in Rhathymini. If indeed the host’s provisions might exert  
548 selective pressures on the cleptoparasites’ immatures (see also Neff & Simpson, 2017)  
549 one would wonder why the Ericrocidini do not also exhibit a similar morphology  
550 despite attacking oil-collecting *Centris* hosts. Further investigation into this matter  
551 should consider the variation observed within *Centris* regarding use of flower oils as  
552 larval food. In addition to *C. (Xerocentris)* and some species of *C. (Penthemisia)* that

553 abandoned oil collecting altogether, Vinson et al. (2006) have shown that species of *C.*  
554 (*Hemisiella*) and *C. (Heterocentris)* differ from other studied subgenera in not adding  
555 oil to the larval provisions. The few Ericrocidini whose first-instar larvae have been  
556 studied (Rozen, 1969, 1991; Rozen et al., 2011) were all obtained from oil-collecting  
557 hosts, but addition of floral oils to the provisions has been attested only for *C. (Centris)*  
558 *flavofasciata* (Vinson et al., 1997). A comparative study over a broader range of  
559 Ericrocidini species should improve our understanding of their divergence from its  
560 sister tribe, the Rhathymini.

561

## 562 **Concluding remarks**

563

564 This is the first molecular based broadly sampled phylogeny of the Ericrocidini  
565 tribe plus Rhathymini, one of the first lineages of cleptoparasitic bees to evolve. We  
566 provide phylogenetic evidences that corroborate the current morphologically based  
567 classification of both tribes. Moreover, we confirm the relationships among the main  
568 lineages of cleptoparasites in the Apinae, altogether the most diverse group of  
569 cleptoparasitic bees, and the monophyly of the ericrocidine line. In this line, we will  
570 find most of cleptoparasites attacking oil bees, mostly parasites of open cells and  
571 possessing hypognathous first instar larvae. Whether these larval characteristics are  
572 related to the use of this alternative floral resource, the oil, by the host is a matter of  
573 further investigation. The use of the floral oil in food provisions, and the effects on the  
574 cleptoparasites, is still poorly understood. We also ignore the pattern of host association  
575 among most ericrocidine line, hampering further conclusions of the evolution of the  
576 cleptoparasitism. The long history of host specialization in Ericrocidini+Rhathymini  
577 line, provided by field observations, are reinforced by the time of origin of this lineage,  
578 almost coincidental to their hosts, *Centris* and *Epicharis*.

579

## 580 **Acknowledgements**

581

582 We acknowledge Laurence Packer and Jessica Litman for specimen loans. We  
583 also thank A. Aguiar, O. Mielke, M. Casagrande, D. Parizotto, P. Grossi, F. Vivallo, H.  
584 Werneck, A. J. Donatti and J. T. Souza for providing specimens. AM was supported by

585 scholarships from CNPq and CAPES; DRL (grant 150252/2017-0) and GARM (grants  
586 304053/2012-0; 309641/2016-0) received financial support from CNPq.

587

## 588 **References**

589

590 Biomatters (2013) Geneious 6.1.6. .

591 Bouckaert, R., Heled, J., Kühnert, D., Vaughan, T., Wu, C.H., Xie, D., Suchard, M.A.,

592 Rambaut, A., & Drummond, A.J. (2014) BEAST 2: A Software Platform for

593 Bayesian Evolutionary Analysis. *PLoS Computational Biology*, **10**, 1–6.

594 Branstetter, M.G., Danforth, B.N., Pitts, J.P., Faircloth, B.C., Ward, P.S., Buffington,

595 M.L., Gates, M.W., Kula, R.R., & Brady, S.G. (2017) Phylogenomic insights into

596 the evolution of stinging wasps and the origins of ants and bees. *Current Biology*,

597 **27**, 1019–1025.

598 Cardinal, S. & Danforth, B.N. (2013) Bees diversified in the age of eudicots.

599 *Proceedings of the Royal Society B*, **280**, 1–9.

600 Cardinal, S., Straka, J., & Danforth, B.N. (2010) Comprehensive phylogeny of apid

601 bees reveals the evolutionary origins and antiquity of cleptoparasitism.

602 *Proceedings of the National Academy of Sciences of the United States of America*,

603 **107**, 16207–11.

604 Danforth, B.N., Cardinal, S., Praz, C., Almeida, E.A.B., & Michez, D. (2013) The

605 impact of molecular data on our understanding of bee phylogeny and evolution.

606 *Annual Review of Entomology*, **58**, 120830113030002.

607 Danforth, B.N., Fang, J., & Sipes, S. (2006) Analysis of family-level relationships in

608 bees (Hymenoptera: Apiformes) using 28S and two previously unexplored nuclear

609 genes: CAD and RNA polymerase II. *Molecular Phylogenetics and*

610 *Evolution*, **39**, 358–72.

611 Emery, C. (1909) Über den Ursprung der dulotischen, parasitischen and myrmekophipel

612 Ameisen. *Biologisches Zentralblatt*, **29**, 352–366.

613 Engel, M.S., Michener, C.D., & Rightmyer, M.G. (2004a) The cleptoparasitic bee tribe

614 Rhathymini (Hymenoptera: Apidae): a new genus and tribal review. *Journal of*

615 *Hymenoptera Research*, **13**, 1–12.

616 Engel, M.S., Michener, C.D., Rightmyer, M.G. (2004b). A replacement name for the

- 617 cleptoparasitic bee genus *Rhathymodes* (Hymenoptera: Apidae). *Journal of*  
618 *Hymenoptera Research* *Journal of Hymenoptera Research* 13: 316.
- 619 Katoh, K. & Standley, D.M. (2013) MAFFT multiple sequence alignment software  
620 version 7: Improvements in performance and usability. *Molecular Biology and*  
621 *Evolution*, **30**, 772–780.
- 622 Klein, A.-M., Vaissière, B.E., Cane, J.H., Steffan-Dewenter, I., Cunningham, S. A,  
623 Kremen, C., & Tscharntke, T. (2007) Importance of pollinators in changing  
624 landscapes for world crops. *Proceedings. Biological sciences / The Royal Society*,  
625 **274**, 303–13.
- 626 Kremen, C., Williams, N.M., & Thorp, R.W. (2002) Crop pollination from native bees  
627 at risk from agricultural intensification. *Proceedings of the National Academy of*  
628 *Sciences of the United States of America*, **99**, 16812–6.
- 629 Litman, J.R., Praz, C.J., Danforth, B.N., Griswold, T.L., & Cardinal, S. (2013) Origins,  
630 evolution, and diversification of cleptoparasitic lineages in long-tongued bees.  
631 *Evolution*, **67**, 2982–2998.
- 632 Martins, A.C. & Melo, G.A.R. (2016) The New World oil-collecting bees *Centris* and  
633 *Epicharis* (Hymenoptera, Apidae): molecular phylogeny and biogeographic history.  
634 *Zoologica Scripta*, **45**, 22–33.
- 635 Martins, A.C., Melo, G.A.R., & Renner, S.S. (2014) The corbiculate bees arose from  
636 New World oil-collecting bees: Implications for the origin of pollen baskets.  
637 *Molecular phylogenetics and evolution*, **80**, 88–94.
- 638 Martins, A.C., Melo, G.A.R., & Renner, S.S. (2015) Gain and loss of specialization in  
639 two oil-bee lineages, *Centris* and *Epicharis* (Apidae). *Evolution*, **69**, 1835–1844.
- 640 Le Masne, G. (1956) Recherches sur les fourmis parasites: *Plagiolepis grassei* et  
641 l'évolution des *Plagiolepis* parasites. *Comptes Rendus de l'Académie des Sciences*,  
642 **243**, 673–675.
- 643 Melo, G.A.R. (1999) Phylogenetic relationships and classification of the major lineages  
644 of Apoidea (Hymenoptera), with emphasis on the crabronid wasps. *Natural History*  
645 *Museum, University of Kansas, Scientific papers*, **14**, 1–55.
- 646 Melo, G.A.R. & Goncalves, R.B. (2005) Higher-level bee classifications (Hymenoptera,  
647 Apoidea, Apidae sensu lato). *Zoologia*, **22**, 153–159.
- 648 Michener, C.D. (2007) *The bees of the world*. The John Hopkins University Press,

- 649 Baltimore, Maryland, USA.
- 650 Michez, D., De Meulemeester, T., Rasmont, P., Nel, A., & Patiny, S. (2009) New fossil  
651 evidence of the early diversification of bees: *Paleohabropoda oudardi* from the  
652 French Paleocene (Hymenoptera, Apidae, Anthophorini). *Zoologica Scripta*, **38**,  
653 171–181.
- 654 Miller, M.A., Pfeiffer, W., & Schwarz, T. (2010) Creating the CIPRES Science Gateway  
655 for inference of large phylogenetic trees. 1–8.
- 656 Moure, J.S. & Melo, G.A.R. (2012a) Rhathymini Lepeletier, 1841. *Catalogue of Bees*  
657 (*Hymenoptera, Apoidea*) in the Neotropical Region - online version.
- 658 Moure, J.S. & Melo, G.A.R. (2012b) Ericrocidini Cockerell & Atkins, 1902. *Catalogue*  
659 *of Bees (Hymenoptera, Apoidea) in the Neotropical Region - online version* (ed. by  
660 J.S. Moure, D. Urban, and G.A.R. Melo),
- 661 Moure, J.S., Melo, G.A.R., & Vivallo, F. (2012) Centridini Cockerell & Cockerell, 1901.  
662 *Catalogue of Bees (Hymenoptera, Apoidea) in the Neotropical Region - online*  
663 *version*.
- 664 Neff, J.L., Simpson, B.B. (2017). Vogel's great legacy: The oil flower and oil-collecting  
665 bees syndrome. *Flora* 232: 104–116.
- 666 Peters, R.S., Krogmann, L., Mayer, C., Rust, J., Misof, B., Niehuis, O., Peters, R.S.,  
667 Krogmann, L., Mayer, C., Donath, A., Gunkel, S., & Meusemann, K. (2017)  
668 Evolutionary history of the Hymenoptera. *Current Biology*, 1–6.
- 669 Rambaut, A., Suchard, M.A., & Drummond, A.J. (2014) Tracer v1.6, 2003–2013:  
670 MCMC trace analysis tool. .
- 671 Rocha-Filho, L.C., Morato, E.F., & Melo, G.A.R. (2009) New host records of  
672 *Aglaomelissa duckei* and a compilation of host associations of Ericrocidini bees  
673 (Hymenoptera: Apidae). *Zoologia*, **26**, 299–304.
- 674 Rocha-Filho, L.C., Ferreira-Caliman, M.J., Serrano, J.C., Camargo, J.M.F., Garofalo,  
675 C.A. (2017) Nesting ecology of the oil-collecting bee *Centris (Melacentris)*  
676 *conspersa* Mocsáry and its potential association with the cleptoparasite  
677 *Cyphomelissa diabolica* Friese (Apidae: Centridini, Ericrocidini). *Journal of*  
678 *Apicultural Research* 56: 489–496.
- 679 Roig-Alsina, A. & Michener, C.D. (1993) Studies of the phylogeny and classification of  
680 long-tongued bees (Hymenoptera: Apoidea). *The University of Kansas Science*

- 681 *Bulletin*, **55**, 123–173.
- 682 Ronquist, F., Teslenko, M., van der Mark, P., Ayres, D.L., Darling, A., Höhna, S., Larget,  
683 B., Liu, L., Suchard, M.A., & Huelsenbeck, J.P. (2012) MrBayes 3.2: efficient  
684 Bayesian phylogenetic inference and model choice across a large model space.  
685 *Systematic Biology*, **61**, 539–42.
- 686 Rozen, J.G. (1969) The larvae of the Anthophoridae (Hymenoptera, Apoidea). Part 3.  
687 The Melectini, Ericrocidini, and Rhathymini. *American Museum Novitates* 2382:  
688 1–24.
- 689 Rozen, J.G. (1989) Morphology and systematic significance of first instars of the  
690 cleptoparasitic bee tribe Epeolini (Anthophoridae: Nomadinae). *American Museum*  
691 *Novitates*, **2957**, 19pp.
- 692 Rozen, J.G. (1991) Evolution of cleptoparasitism in anthophorid bees as revealed by  
693 their mode of parasitism and first instars (Hymenoptera: Apoidea). *American*  
694 *Museum Novitates*, **3029**, 1–36.
- 695 Rozen, J.G. (2003) Eggs, ovariole numbers, and modes of parasitism of cleptoparasitic  
696 bees, with emphasis on neotropical species (Hymenoptera, Apoidea). *American*  
697 *Museum Novitates* 3413: 1–36.
- 698 Rozen, J.G., Melo, G.A.R., Aguiar, A.J.C., Alves-dos-Santos, I. (2006) Nesting  
699 biologies and immature stages of the Tapinotaspidine bee genera *Monoeca* and  
700 *Lanthanomelissa* and of their Osirine cleptoparasites *Protosiris* and *Parepeolus*  
701 (Hymenoptera: Apidae: Apinae). *American Museum Novitates* 3501: 1–60.
- 702 Rozen, J.G., Vinson, S.B., Coville, R.E., Frankie, G.W. (2011). Biology of the  
703 cleptoparasitic bee *Mesoplia sapphirina* (Ericrocidini) and its host *Centris*  
704 *flavofasciata* (Centridini) (Apidae, Apinae). *American Museum Novitates* 3723: 1–  
705 36.
- 706 Schaefer, H. & Renner, S.S. (2008) A phylogeny of the oil bee tribe Ctenoplectrini  
707 (Hymenoptera: Anthophila) based on mitochondrial and nuclear data: evidence for  
708 early Eocene divergence and repeated out-of-Africa dispersal. *Molecular*  
709 *phylogenetics and evolution*, **47**, 799–811.
- 710 Silveira, F.A., Melo, G.A.R., & Almeida, E.A.B. (2002) *Abelhas brasileiras:*  
711 *sistemática e identificação*. F. A. Silveira,
- 712 Silvestro, D. & Michalak, I. (2012) raxmlGUI: a graphical front-end for RAxML.

- 713           *Organisms Diversity & Evolution*, **12**, 335–337.
- 714 Snelling, R.R. & Brooks, R.W. (1985) A review of the genera of cleptoparasitic bees of  
715           the tribe Ericrocidini (Hymenoptera: Anthophoridae). *Contributions in Science*,  
716           **369**, 1–34.
- 717 Stamatakis, A. (2006) RAxML-VI-HPC: maximum likelihood-based phylogenetic  
718           analyses with thousands of taxa and mixed models. *Bioinformatics*, **22**, 2688–90.
- 719 Straka, J. & Bogusch, P. (2007a) Phylogeny of the bees of the family Apidae based on  
720           larval characters with focus on the origin of cleptoparasitism (Hymenoptera:  
721           Apiformes). *Systematic Entomology*, **32**, 700–711.
- 722 Straka J, Bogusch P. (2007b). Description of immature stages of cleptoparasitic bees  
723           *Epeoloides coecutiens* and *Leiopodus trochantericus*. *Entomologica Fennica* 17:  
724           242–254.
- 725 Thiele, R. (2008) A review of the Neotropical bee genus *Ctenioschelus* Romand  
726           (Hymenoptera: Apidae: Ericrocidini). *Entomological News*, **119**, 278–286.
- 727 Vinson, S.B., Frankie, G.W., Williams, H.J. (2006) Nest liquid resources of several  
728           cavity nesting bees in the genus *Centris* and the identification of a preservative,  
729           levulinic acid. *Journal of Chemical Ecology* 32: 2013–2021.
- 730 Vinson, S.B., Williams, H.J., Frankie, G.W., Shrum, G. (1997) Floral lipid chemistry of  
731           *Byrsonima crassifolia* (Malpighiaceae) and a use of floral lipids by *Centris* bees  
732           (Hymenoptera: Apidae). *Biotropica* 29: 76–83.
- 733 Walker, J.D., Geissman, J.W., Bowring, S.A., & Babcock, L.E. (2012) *Geological Time*  
734           *Scale v. 4.0: Geological Society of America*. The Geological Society of America,
- 735 Wcislo, W.T. & Cane, J.H. (1996) Floral resource utilization by solitary bees  
736           (Hymenoptera: Apoidea) and exploitation of their stored foods by natural enemies.  
737           *Annual review of entomology*, **41**, 257–86.
- 738 Werneck, H.A., Melo, G.A.R., & Campos, L.A.O. (2012) First host record for the  
739           cleptoparasitic bee *Rhathymus friesei* Ducke (Hymenoptera, Apidae). *Revista*  
740           *Brasileira de Entomologia*, **56**, 519–521.

741

## 742 **Figures**

743

744 **Figure 1.** Diversity of Ericrocidini: a. *Acanthopus palmatus* (Olivier, 1789); b.

745 *Aglaomelissa duckei* (Friese, 1906); c. *Ctenioschelus goryi* (Romand, 1840), female; d.  
746 *Ctenioschelus goryi*, male; e. *Cyphomelissa magnifica* Moure, 1958; f. *Epiclopus gayi*  
747 Spinola, 1851; g. *Ericrocis pintada* Snelling & Zavortink, 1985; h. *Eurytis funereus*  
748 Smith, 1854

749 **Figure 2.** Diversity of Ericrocidini (a-e) and Rhathymini (f) genera: a. *Hopliphora*  
750 *velutina* Lepeletier & Serville, 1825; b. *Mesocheira bicolor* (Fabricius, 1804); c.  
751 *Mesoplia ornata* (Spinola, 1841), female; d. *Mesoplia ornata*, male; e. *Mesonychium*  
752 *coerulescens* Lepeletier & Serville, 1825; f. *Rhathymus quadriplagiatus* (Smith, 1860).

753 **Figure 3.** Bayesian phylogenetic tree based on the combined analysis of four nuclear  
754 markers and one mitochondrial(46 taxa and 4419 aligned nucleotides) for Ericrocidini  
755 plus Rhathymini and other tribes of the cleptoclade (*sensu* Cardinal et al.(2010)) rooted  
756 on Anthophorini. Bayesian posterior probabilities (>95) are shown at nodes. In  
757 GenBank the following species are identified as \**Nanorhathymus* sp \*\**Hopliphora*  
758 *velutina*

759 **Figure 4.** Maximum clade credibility tree derived from BEAST analysis with the same  
760 matrix analyzed phylogenetically (Fig. 3 and S1). Node bars represent 95% highest  
761 posterior density intervals (HPD) on well-supported nodes. Stars on nodes represent: 1.  
762 Fossil calibration point: *Paleohabropoda oudardii* from the Paleocene of Menat, France;  
763 2. Root age constrain: divergence between Anthophorini and the cleptoclade. See  
764 material and methods for details on node calibrations. Below the Geological Time Scale  
765 (Walker et al., 2012).

766

## 767 **Supporting information**

### 768 **Figures**

769 **Figure S1.** Maximum likelihood phylogenetic tree based on the combined analysis  
770 of four nuclear markers and one mitochondrial (46 taxa and 4419 aligned nucleotides)  
771 for Ericrocidini plus Rhathymini and other tribes of the cleptoclade (*sensu* Cardinal et  
772 al.(2010)) rooted on Anthophorini. Maximum likelihood bootstrap values (>70) are  
773 shown at nodes

774

### 775 **Tables**

776 **Table S1.** Newly produced sequences used in this study with author names, collecting



777 data, voucher information, and GenBank accession numbers. Entomological collections  
778 acronyms: UNB: University of Brasilia, Brasilia, Brazil; DZUP: Entomological  
779 Collection Pe. Jesus Santiago Moure, Federal University of Parana, Curitiba, Brazil;  
780 **Table S2.** GenBank sequences used in this study, with species name, collection data and  
781 accession numbers.  
782 **Table S3.** Regions of bee DNA sequenced, number of base pairs and related primers  
783 and references  
784

(A)

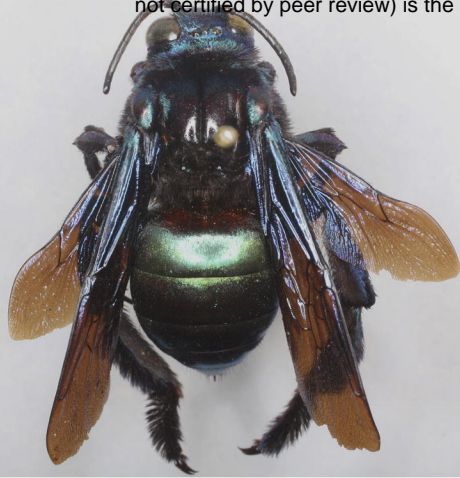

(B)

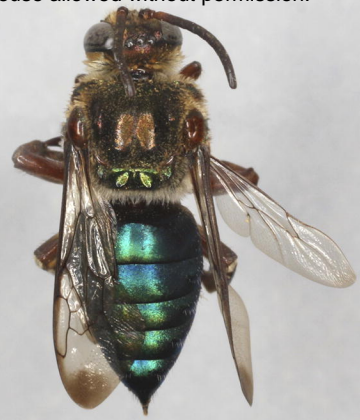

(C)

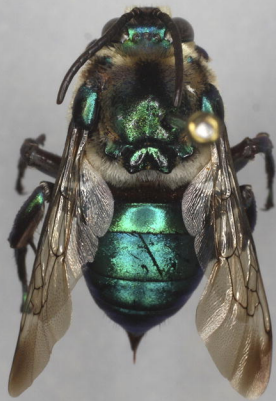

(D)

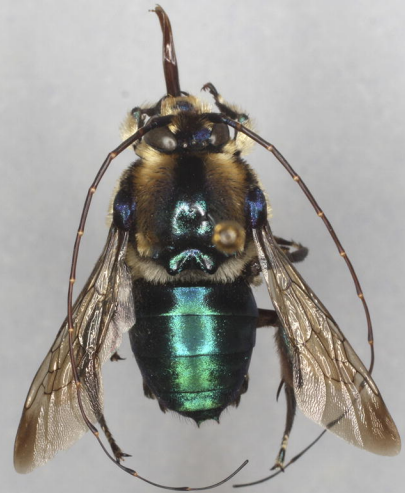

(E)

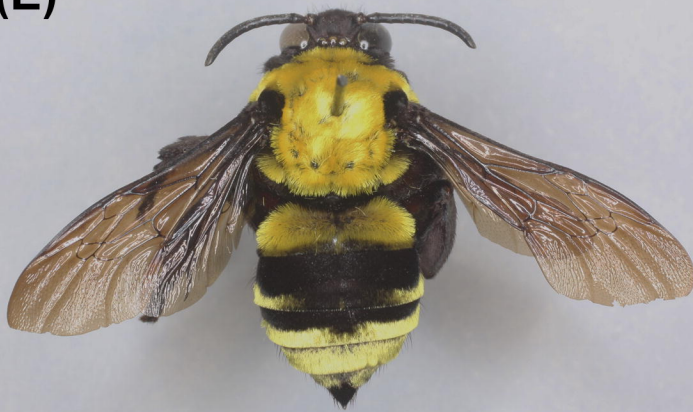

(F)

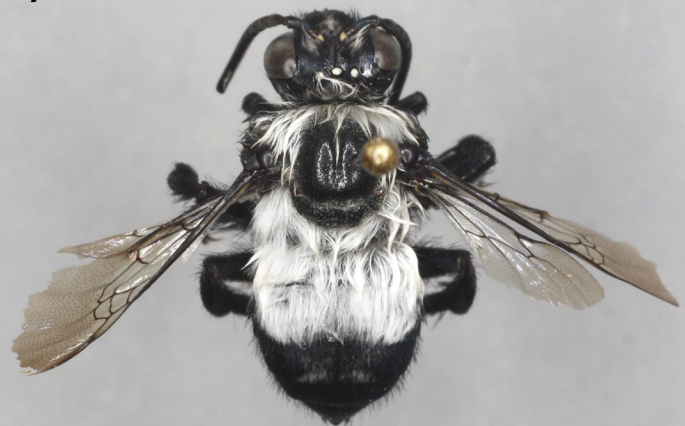

(G)

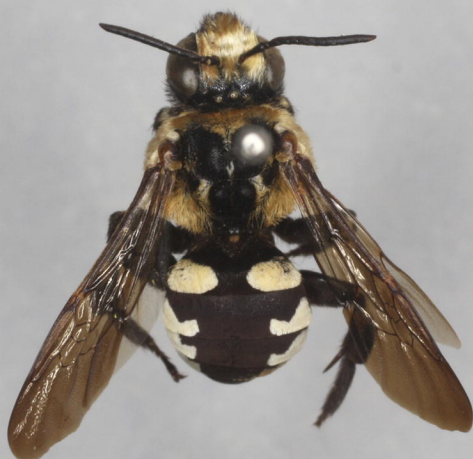

(H)

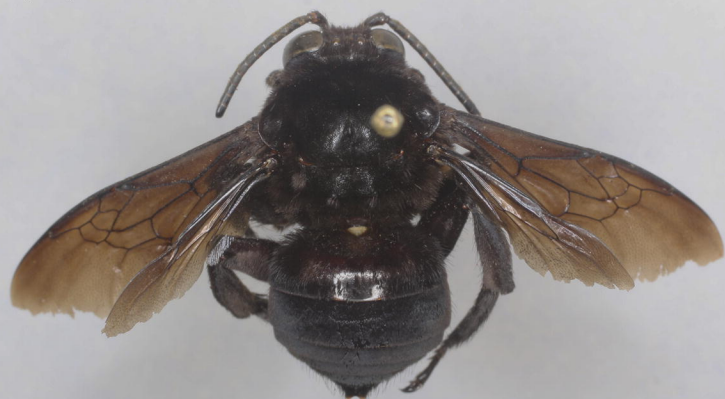

(A)

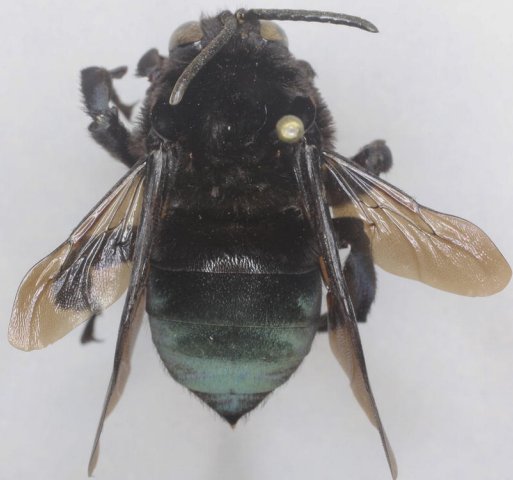

(B)

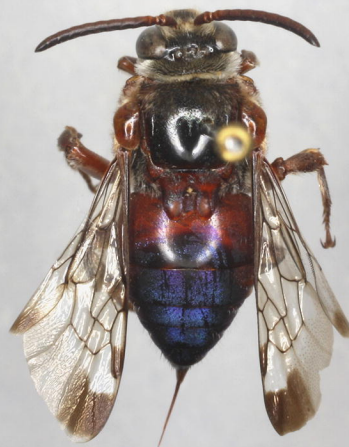

(C)

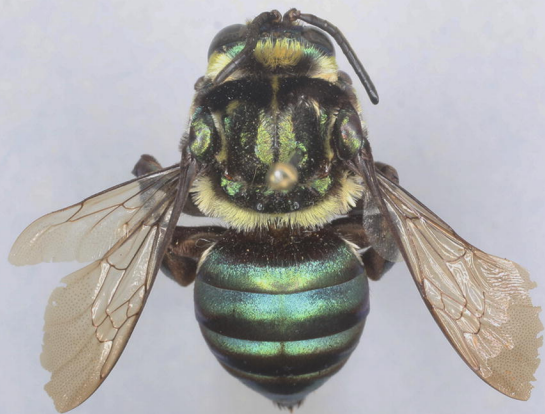

(D)

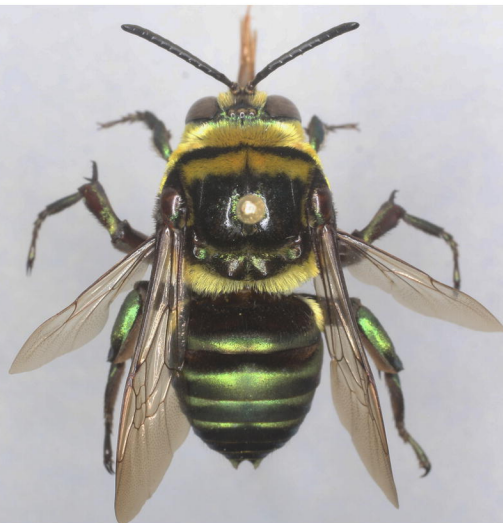

(E)

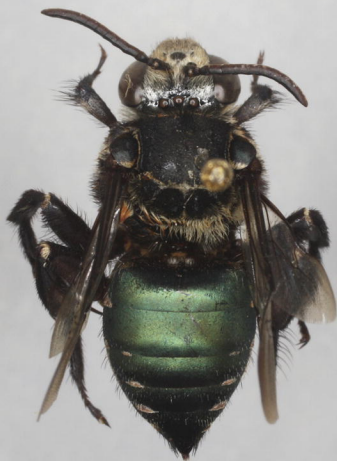

(F)

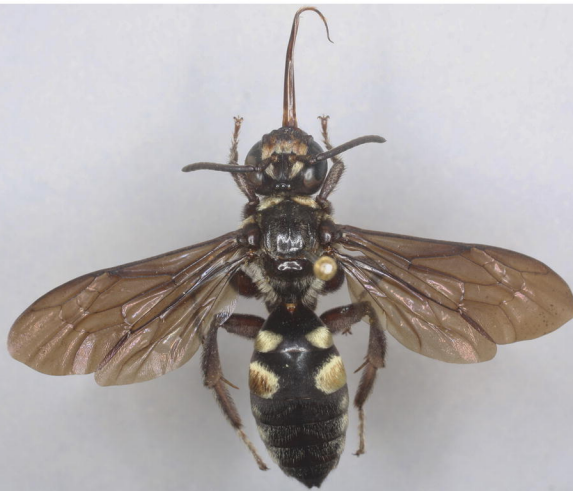

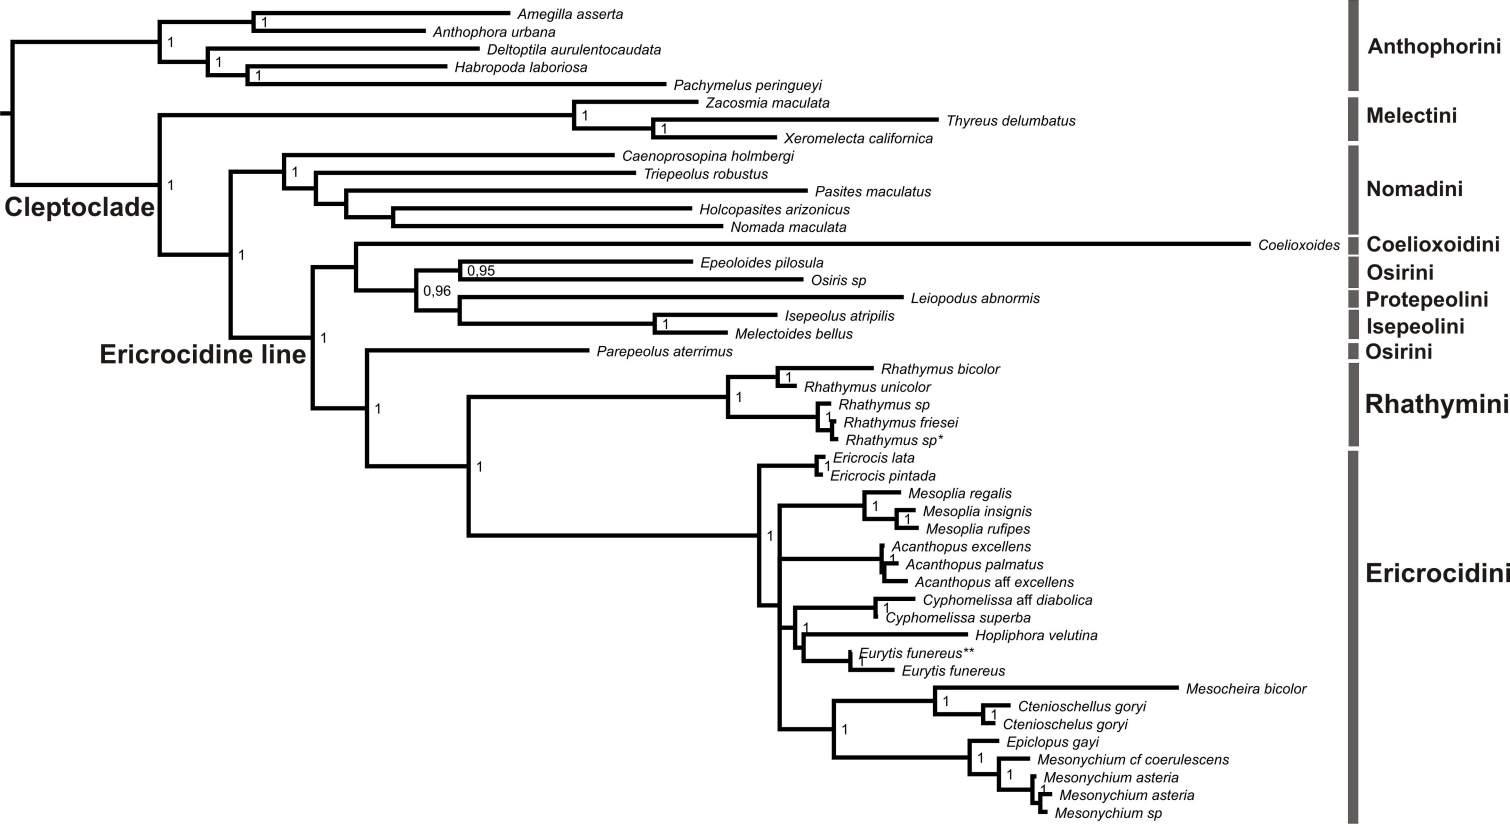

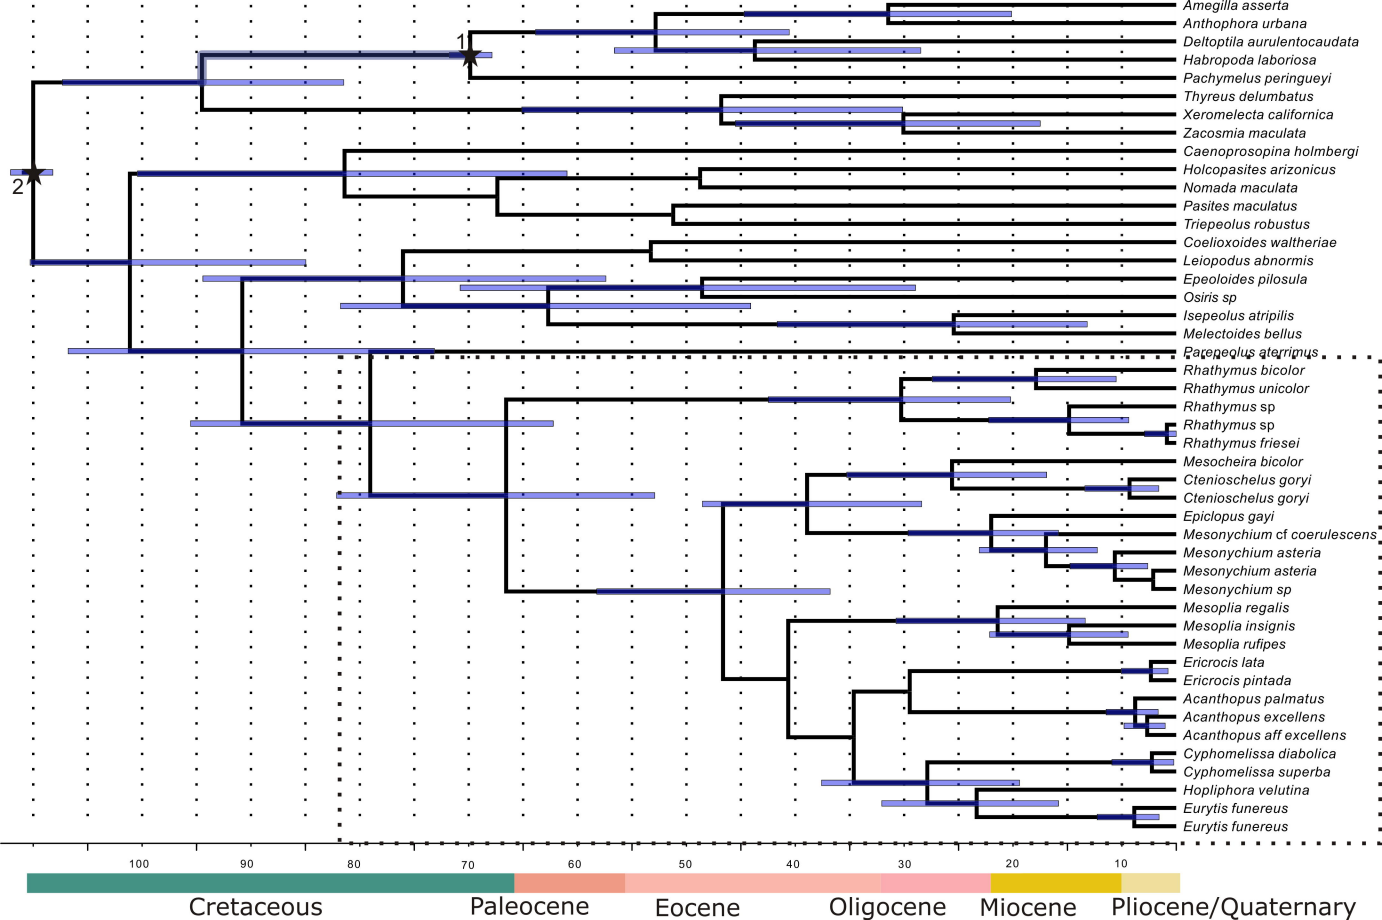

Source: http://biorxiv.org/content/10.1101/224683v1.full.pdf
